# Supplementary material
Source: ML conference proceedings conference paper supplement (https://openreview.net/forum?id=_ruvo2KCL2x)
Supplement: supplementary_material [file attachment]

## A BAYESIAN OPTIMIZATION WITH DEEP RANKING ENSEMBLES

Once the Deep Ensembles are trained, we aggregate the predictions for an input  $x$  following the procedure explained in Section 3.2 to obtain  $\mu(x), \sigma(x)$  and conditioning to a set of observations  $\mathcal{D}_s$ . For the sake of simplicity, we omit this conditioning in our notation. These outputs can be fed in several types of acquisition functions and decide for the next point  $x$  to observe from the set of pending points to evaluate  $\mathcal{X}$ . Notice that the lower rank, the better the configuration, therefore we formulate the cast the acquisition function as a minimization problem. Specifically, we consider:

- **Average Rank:**  $\alpha(x_j) = \mu(x_j)$
- **Lower Confidence Bound:**  $\alpha(x_j) = \mu(x_j) - \beta \cdot \sigma(x_j)$
- **Expected Improvement:**  $\alpha(x_j) = \int_r \max(0, \mu(x_k) - r) \mathcal{N}(r; \mu(x_j), \sigma(x_j))$

Where  $\beta$  is a factor that trades of exploitation and exploration and  $x_i$  is the best-observed configuration, i.e.  $k = \arg \min_{i \in \{1, \dots, |\mathcal{D}_s|\}} y_i$  and  $\mu(x_k)$  is the average rank predicted for that configuration. The previous formulation assumes a minimization, thus to choose the next query point you apply:  $x = \arg \min_{x_j \in \mathcal{X}} \alpha(x_j)$ .

---

### Algorithm 2: Bayesian Optimization with DRE

---

**Input :** A prior distribution over datasets  $p(\mathcal{D})$ , initial observations  $H = \{(x_1, y_1), \dots, (x_N, y_N)\}$ , pending points  $\mathcal{X}$ , number of BO iterations  $K$ , black-box function to optimize  $f$

**Output:** Best observed configuration  $x_*$

- 1 Train ensemble of MLP scorers following Algorithm 1 and prior  $p(\mathcal{D})$ ;
  - 2 **for**  $j \leftarrow 1$  **to**  $K$  **do**
  - 3     Suggest next candidate  $x = \arg \min_{x_j \in \mathcal{X}} \alpha(x_j, H)$  ;
  - 4     Observe response  $y = f(x)$  ;
  - 5     Update history  $H = H \cup \{(x, y)\}$ ;
  - 6 **end**
  - 7 Return top performing configuration:  $\arg \min_{(x_i, y_i) \in H} y_i$
- 

## B EXPERIMENTAL SETUP FOR DEEP RANKING ENSEMBLES

**Meta-Feature Extractor** The DRE model has two configurable components: the meta-feature network and the scorers. The meta-feature extractor is a DeepSet with an architecture similar to the one used by Jomaa et al. (2021a). However, we used 2 fully connected layers with 32 neurons each for both  $\phi$  and  $\rho$  (Deep Set parameters) instead of 3 fully connected layers. The output size is set to 16 by default.

**Ensemble of Scorers** The ensemble of scorers is a group of 10 MLP (Multilayer Perceptrons) with identical architectures. Each neural network has 4 hidden layers and each hidden layer has 32 neurons. The neural networks are initialized independently and randomly (for DRE-RI) or warm-initialized with the meta-learned weights. The input size of each neural network is 16 (the dimensionality of the meta-features), plus the HP search space dimensionality. their output size is 1.

**Setup for Motivating Example.** For the creation of the Figure 2, we use as scorer network an MLP with 2 hidden layers and 10 neurons per layer. The meta-feature extractor has 4 layers and 10 neurons, and output dimensions equal to 10. The network is meta-trained for 1000 epochs, with batch size 10, learning rate 0.001, Adam Optimizer, and 10 models in the ensemble. For the meta-learning example, we do not fine-tune the networks, while we fine-tune the networks for the non-meta-learned example for 500 iterations.

## C ADDITIONAL PLOTS

We present additional results on the critical difference diagrams for *i*) Transfer methods results (Figure 8a), *ii*) Non-Transfer (Figure 8b), *iii*) Scorer size (Figure 9a), *iv*) Acquisition Function (Figure

9b,  $v$  Ranking Loss (Figure 10a) and  $v_i$  Meta-features (Figure 10b). These CD plots show the comparison of the performance at different number of trials (e.g. at 25 trials = Rank@25). The vertical lines connecting two methods indicate that their performances are not significantly different.

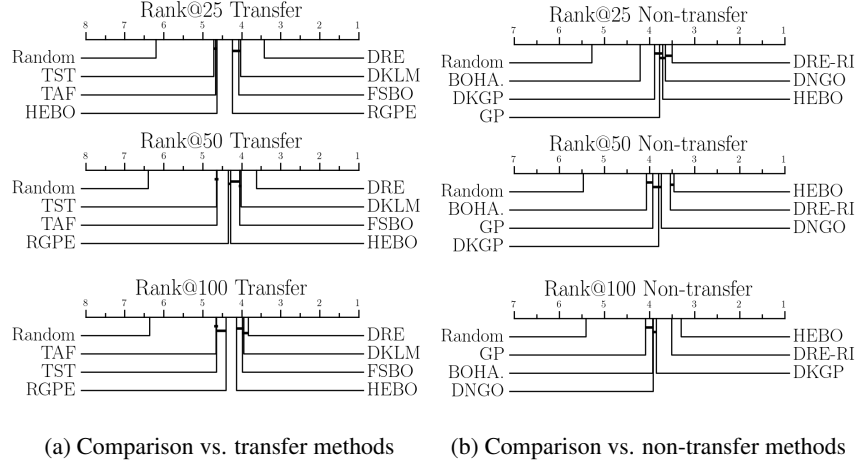

Figure 8: Critical Difference Diagram for a) Transfer and b) Non-transfer.

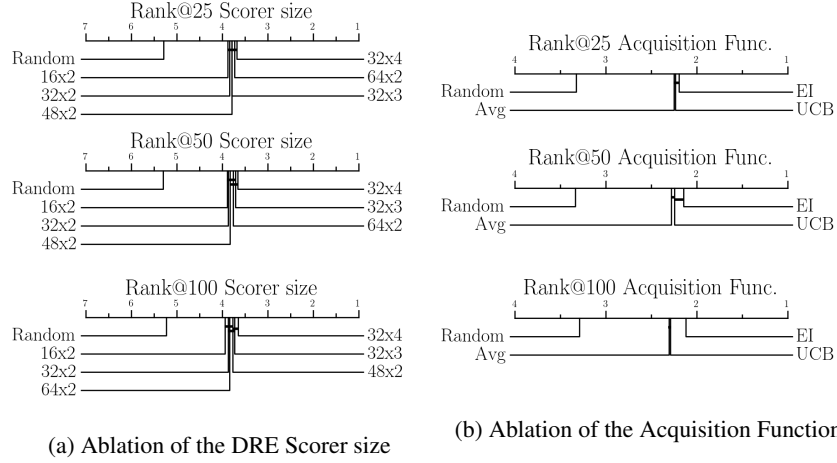

Figure 9: Critical Difference Diagram for the results of the ablation of DRE hyperparameters in (a) and the choice of the acquisition function from Hypothesis 5 in (b).

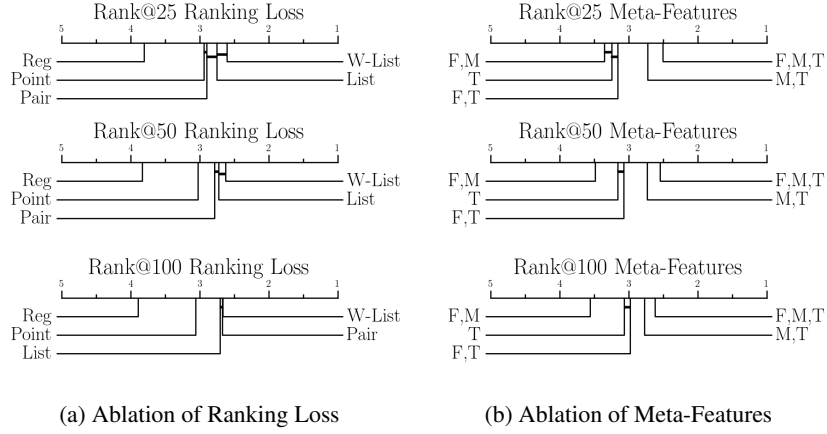

Figure 10: Critical Difference Diagrams for the results of Hypothesis 3 in a) and Hypothesis 4 in b).

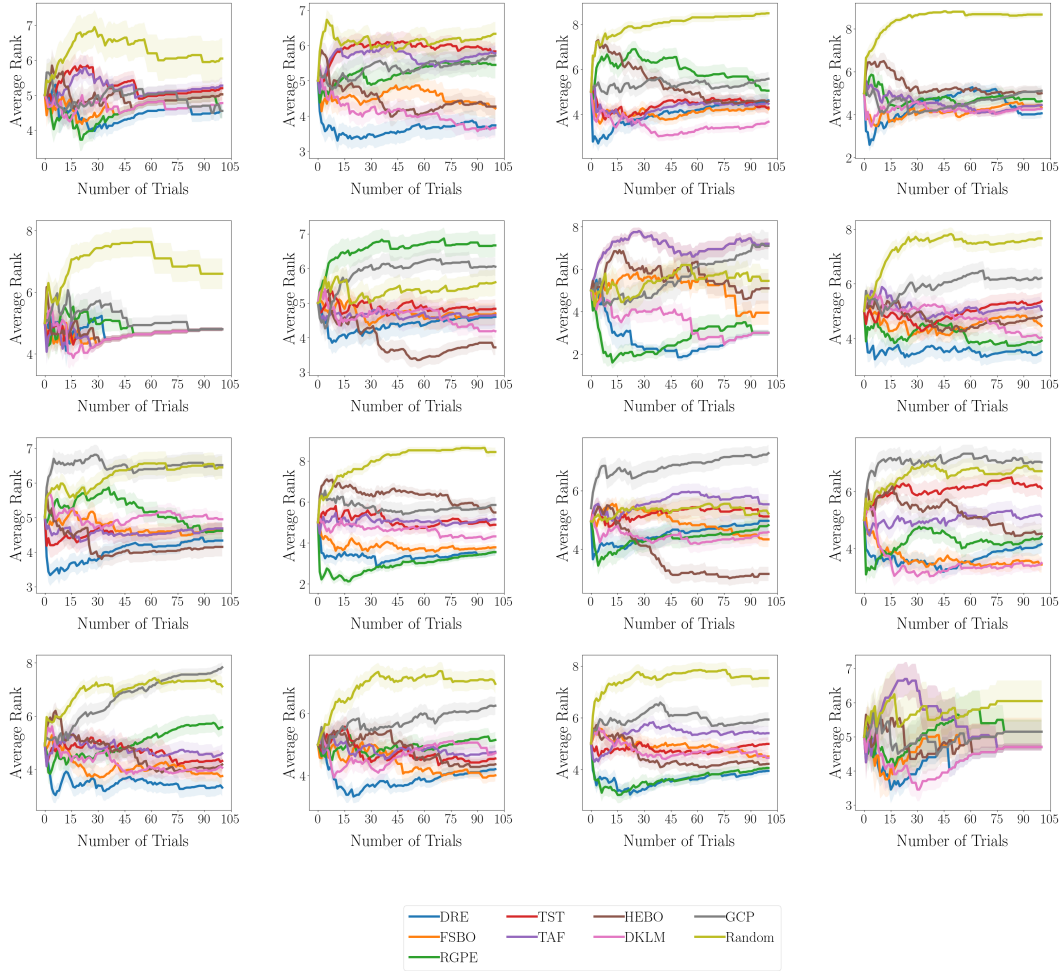

Figure 11: Average Rank per Search Space (Transfer Methods)

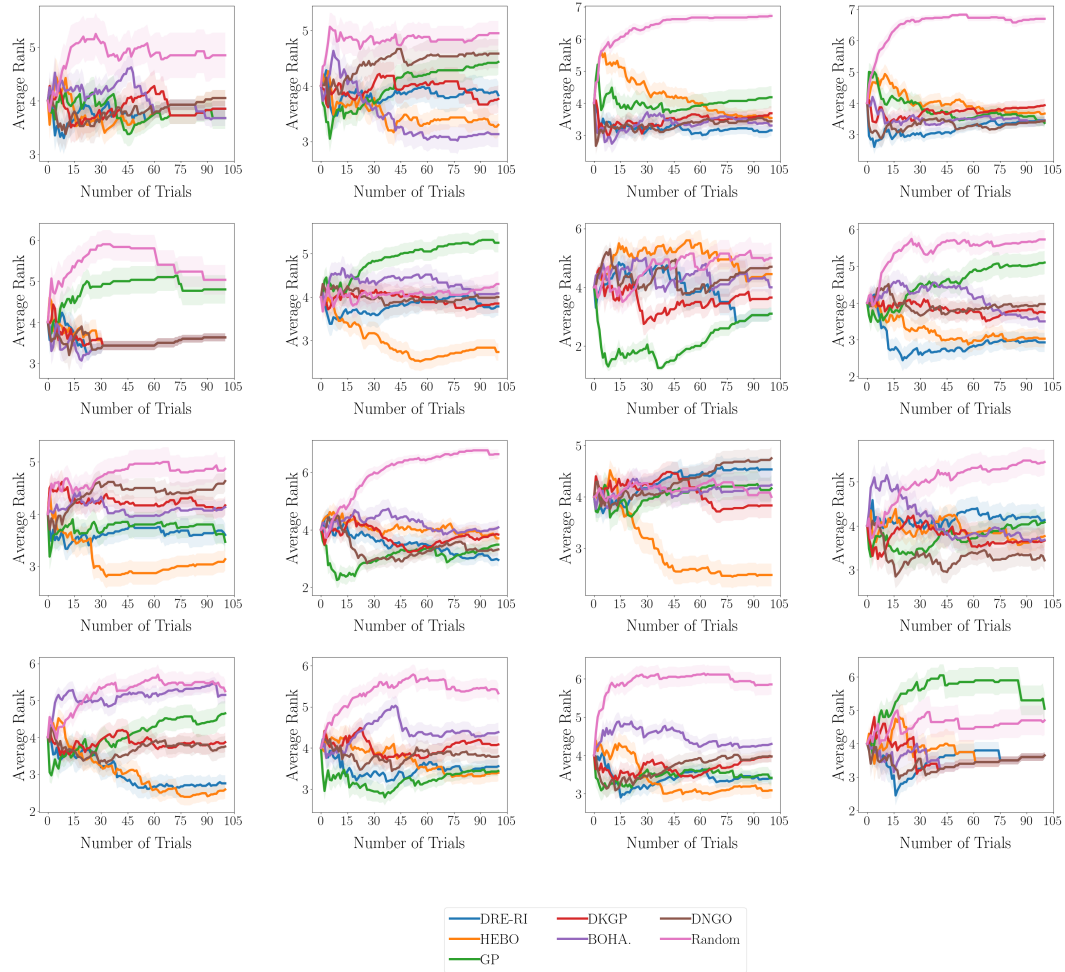

Figure 12: Average Rank per Search Space (Non-Transfer Methods)
